# Supplementary material for: Invasive Urban Mammalian Predators: Distribution and Multi-Scale Habitat Selection
Source: MDPI journal article supplement (doi:10.3390/biology11101527), 2022-10-19
Supplement: s1 [file s1]

**Supplementary material for *Invasive urban mammalian predators: distribution and multi-scale habitat selection*, by Miller, K. F., Wilson, D. J., Hartley S., Innes, J. G., Fitzgerald, N. B., Miller, P., and van Heezik, Y.**

*Variable selection for models using a reduced set of variables*

The variables rock cover, bare soil cover, and woody debris cover were removed from the parameter pool as their data distributions were strongly skewed towards 0. Mown lawn cover, low artificial cover, and building cover were removed due to strong correlation with residential garden habitat, leaving leaf litter cover as the only ground cover variable. Of the four height strata, upper canopy cover ( $\geq 12$  m) was removed as it was zero at most stations.

The variable DBH was retained, as were distances from the coast (Wellington and Dunedin only), from freshwater bodies, from grassy fields/pasture, and from forest patches (specific to amenity parks and residential gardens).

*Variable selection for base models*

The base models for rats and mice (rodents) were created using all 17 variables, with an interaction between city and habitat type. The base hedgehog model did not have this interaction term, as preliminary results suggested it was unneeded. DBH was also omitted from the hedgehog model, as tree size was thought unlikely to affect their habitat use, owing to their limited climbing ability. Distances to coast and freshwater bodies were included in the rodent models only, because of the frequent association of Norway rats with water (Russell & Innes 2021). Because possums were almost undetected in Wellington, this city was removed from the possum model, and owing to the very low number of residential detections of possums in the other two cities, residential-only modelling was not carried out for this species.

Table S1: Mean number of days on which cats and dogs were detected on sampling transects by motion-activated cameras (two per transect) during 7-day sampling periods in three habitat types (amenity parks, forest fragments and residential gardens) in spring 2017 and autumn 2018 in Dunedin and Hamilton (n = 4 transects in each habitat) and Wellington (n = 8; n = 7 in amenity parks in autumn).

| <i>Season</i> | <i>City</i> | <i>Habitat<br/>type</i> | <i>Cats</i> |           | <i>Dogs</i> |           |
|---------------|-------------|-------------------------|-------------|-----------|-------------|-----------|
|               |             |                         | <i>Mean</i> | <i>SE</i> | <i>Mean</i> | <i>SE</i> |
| Spring        | Dunedin     | Forest                  | 2.2         | 0.6       | 0.5         | 0.3       |
| Spring        | Dunedin     | Amenity                 | 5.8         | 0.6       | 0.8         | 0.5       |
| Spring        | Dunedin     | Residential             | 5.2         | 1.2       | 1.5         | 1.2       |
| Spring        | Wellington  | Forest                  | 0.2         | 0.2       | 1.1         | 0.7       |
| Spring        | Wellington  | Amenity                 | 1.2         | 0.8       | 0.4         | 0.3       |
| Spring        | Wellington  | Residential             | 2.5         | 0.5       | 0.2         | 0.2       |
| Spring        | Hamilton    | Amenity                 | 2.8         | 0.5       | 1.2         | 0.8       |
| Spring        | Hamilton    | Forest                  | 2.8         | 0.8       | 0           | 0         |
| Spring        | Hamilton    | Residential             | 4.8         | 0.6       | 0           | 0         |
| Autumn        | Dunedin     | Amenity                 | 4.8         | 0.5       | 1.8         | 1.2       |
| Autumn        | Dunedin     | Forest                  | 2.8         | 0.5       | 0.2         | 0.2       |
| Autumn        | Dunedin     | Residential             | 6.2         | 0.2       | 1.5         | 1.5       |
| Autumn        | Wellington  | Forest                  | 2.4         | 0.8       | 1           | 0.3       |
| Autumn        | Wellington  | Amenity                 | 1.3         | 0.4       | 0.9         | 0.5       |
| Autumn        | Wellington  | Residential             | 4.9         | 0.4       | 1.1         | 0.7       |
| Autumn        | Hamilton    | Amenity                 | 1.8         | 0.8       | 1.5         | 0.6       |
| Autumn        | Hamilton    | Forest                  | 3.2         | 1.1       | 0           | 0         |
| Autumn        | Hamilton    | Residential             | 6.8         | 0.2       | 0           | 0         |

Table S2. Summary statistics for coefficients of parameters in the residential rat model (Table 2 shows only residential-specific variables). Odds ratio (OR) is calculated at the median posterior density. Credible intervals (CI) are highest posterior density intervals (HDI) at the 90% level (5% - 95%; used because of instability at higher levels). MPE is maximum probability of effect. Statistical significance (when the 90% CI does not include 1) is denoted by + and bold text. MPE was always >0.95 (equivalent to frequentist 2-tailed  $p < 0.1$ ) when the 90% CI did not include 1. MPE  $\geq 0.975$  and  $\geq 0.995$  are shown as \* and \*\*, respectively and bolded. Effects of categorical variables are relative to a reference category, i.e. Season = Spring, City = Wellington, Method = Camera, level of maintenance = Low, and Compost = No.

| <i>Parameter</i>                       | <i>OR</i>    | <i>CI</i>          | <i>MPE</i>   | <i>Significance</i> |
|----------------------------------------|--------------|--------------------|--------------|---------------------|
| Intercept                              | 1.88         | 0.25 – 13.23       | 0.701        |                     |
| Season = Autumn                        | 1.27         | 0.75 – 2.09        | 0.775        |                     |
| City = Hamilton                        | 1.06         | 0.22 - 4.65        | 0.527        |                     |
| City = Dunedin                         | 0.56         | 0.15 - 1.98        | 0.780        |                     |
| <b>Method = Cards</b>                  | <b>0.38</b>  | <b>0.18 - 0.79</b> | 0.986        | *                   |
| Distance to nearest field              | 2.25         | 0.79 - 6.96        | 0.897        |                     |
| <b>Distance to forest</b>              | <b>0.07</b>  | <b>0.01 - 0.56</b> | 0.987        | *                   |
| Level of maintenance = Medium          | 0.43         | 0.14 - 1.16        | 0.918        |                     |
| Level of maintenance = High            | 0.39         | 0.12 - 1.31        | 0.909        |                     |
| <b>Compost = Yes</b>                   | <b>2.77</b>  | <b>1.19 - 6.25</b> | 0.986        | *                   |
| <b>Proportion of native vegetation</b> | <b>0.13</b>  | <b>0.02 - 0.71</b> | 0.977        | *                   |
| Garden bed cover                       | 0.34         | 0.01 - 6.58        | 0.716        |                     |
| Mown lawn cover                        | 0.26         | 0.04 - 1.41        | 0.902        |                     |
| Artificial characteristics             | 0.43         | 0.05 - 3.03        | 0.760        |                     |
| Leaf litter                            | 0.17         | 0.02 - 1.33        | 0.928        |                     |
| <b>Lower canopy cover</b>              | <b>25.72</b> | <b>1.35 - 540</b>  | <b>0.963</b> | +                   |
| Shrub layer cover                      | 0.93         | 0.07 - 13.2        | 0.516        |                     |

Table S3. Rat detection odds compared *a)* between cities, averaging over habitat types, and *b)* between cities within each habitat type, using post-hoc comparisons based on the estimated marginal means. Values are estimated odds ratios with 90% credible intervals (CI; 5–95%). MPE and significance are defined as in Table S2.

a)

| <i>City comparisons</i>      | <i>OR</i>   | <i>CI</i>          | <i>MPE</i>   | <i>Significance</i> |
|------------------------------|-------------|--------------------|--------------|---------------------|
| <b>Wellington - Hamilton</b> | <b>2.84</b> | <b>1.04 - 7.97</b> | <b>0.958</b> | <b>+</b>            |
| <b>Wellington - Dunedin</b>  | <b>4.78</b> | <b>1.67 - 13.7</b> | <b>0.994</b> | <b>*</b>            |
| Hamilton - Dunedin           | 1.69        | 0.54 - 4.94        | 0.785        |                     |

b)

| <i>City comparisons</i>      | <i>Habitat type</i> | <i>OR</i>   | <i>CI</i>          | <i>MPE</i>   | <i>Significance</i> |
|------------------------------|---------------------|-------------|--------------------|--------------|---------------------|
| <b>Wellington - Hamilton</b> | <b>Forest</b>       | <b>5.42</b> | <b>1.24 - 26.8</b> | <b>0.962</b> | <b>+</b>            |
| <b>Wellington - Dunedin</b>  | <b>Forest</b>       | <b>7.17</b> | <b>1.50 - 34.3</b> | <b>0.981</b> | <b>*</b>            |
| Hamilton - Dunedin           | Forest              | 1.33        | 0.19 - 7.86        | 0.599        |                     |
| Wellington - Hamilton        | Amenity             | 3.49        | 0.72 - 18.5        | 0.904        |                     |
| <b>Wellington - Dunedin</b>  | <b>Amenity</b>      | <b>14.2</b> | <b>2.25 - 81.4</b> | <b>0.994</b> | <b>*</b>            |
| Hamilton - Dunedin           | Amenity             | 4.09        | 0.59 - 25.9        | 0.894        |                     |
| Wellington - Hamilton        | Residential         | 1.20        | 0.19 - 7.80        | 0.566        |                     |
| Wellington - Dunedin         | Residential         | 1.08        | 0.20 - 5.63        | 0.53         |                     |
| Hamilton - Dunedin           | Residential         | 0.90        | 0.15 - 6.40        | 0.539        |                     |

Table S4. Rat detection compared *a)* between habitat types, averaging over cities, and *b)* between habitat types within each city, using post-hoc comparisons based on the estimated marginal means. Values are estimated odds ratios with 90% credible intervals (CI; 5–95%). MPE and significance are defined as in Table S2.

a)

| <i>Habitat comparisons</i>   | <i>OR</i>   | <i>CI</i>          | <i>MPE</i>   | <i>Significance</i> |
|------------------------------|-------------|--------------------|--------------|---------------------|
| Forest - Amenity             | 2.37        | 0.70 - 7.42        | 0.894        |                     |
| Forest - Residential         | 0.52        | 0.13 - 1.97        | 0.793        |                     |
| <b>Amenity - Residential</b> | <b>0.22</b> | <b>0.05 - 1.05</b> | <b>0.956</b> | <b>+</b>            |

b)

| <i>Habitat comparisons</i>   | <i>City</i>    | <i>OR</i>   | <i>CI</i>          | <i>MPE</i>   | <i>Significance</i> |
|------------------------------|----------------|-------------|--------------------|--------------|---------------------|
| Forest - Amenity             | Wellington     | 2.18        | 0.60 - 7.98        | 0.845        |                     |
| Forest - Residential         | Wellington     | 1.59        | 0.44 - 6.40        | 0.715        |                     |
| Amenity - Residential        | Wellington     | 0.73        | 0.17 - 3.47        | 0.635        |                     |
| Forest - Amenity             | Hamilton       | 1.42        | 0.22 - 9.09        | 0.623        |                     |
| Forest - Residential         | Hamilton       | 0.36        | 0.04 - 3.53        | 0.771        |                     |
| Amenity - Residential        | Hamilton       | 0.25        | 0.02 - 2.67        | 0.829        |                     |
| Forest - Amenity             | Dunedin        | 4.37        | 0.58 - 38.1        | 0.879        |                     |
| Forest - Residential         | Dunedin        | 0.24        | 0.03 - 1.85        | 0.88         |                     |
| <b>Amenity - Residential</b> | <b>Dunedin</b> | <b>0.05</b> | <b>0.00 - 0.57</b> | <b>0.981</b> | <b>*</b>            |

Table S5. Summary statistics for coefficients of parameters in the residential hedgehog model (Table 3 shows only residential-specific variables). OR, CI, MPE and significance are defined as in Table S2. Effects of categorical variables are relative to a reference category, i.e., Season = Spring, City = Wellington, Method = Camera, level of maintenance = Low, and Compost = No.

| <i>Parameter</i>                 | <i>OR</i>    | <i>CI</i>          | <i>MPE</i>   | <i>Significance</i> |
|----------------------------------|--------------|--------------------|--------------|---------------------|
| Intercept                        | 0.829        | 0.08 – 8.93        | 0.554        |                     |
| <b>Season = Autumn</b>           | <b>0.171</b> | <b>0.09 – 0.3</b>  | <b>1</b>     | <b>**</b>           |
| <b>City = Hamilton</b>           | <b>1.45</b>  | <b>0.25 – 9.75</b> | <b>0.638</b> |                     |
| <b>City = Dunedin</b>            | <b>24</b>    | <b>4.12 - 155</b>  | <b>0.997</b> | <b>**</b>           |
| <b>Method = Cards</b>            | <b>0.39</b>  | <b>0.18 - 0.80</b> | <b>0.99</b>  | <b>*</b>            |
| Level of maintenance =<br>Medium | 1.11         | 0.31 - 4.17        | 0.555        |                     |
| Level of maintenance = High      | 0.97         | 0.24 - 3.77        | 0.512        |                     |
| Compost = Yes                    | 0.65         | 0.27 – 1.69        | 0.77         |                     |
| Proportion of native vegetation  | 0.3          | 0.04 - 1.62        | 0.874        |                     |
| Garden bed cover                 | 0.65         | 0.03 - 19.09       | 0.583        |                     |
| Mown lawn cover                  | 1.2          | 0.18 - 7.51        | 0.562        |                     |
| Artificial characteristics       | 0.42         | 0.04 - 3.34        | 0.754        |                     |
| Herb layer cover                 | 2.23         | 0.37 - 14.09       | 0.773        |                     |
| Lower canopy cover               | 4.61         | 0.20 - 104.06      | 0.792        |                     |

Table S6. Hedgehog detection compared *a*) between cities, averaging over habitat types, and *b*) between habitat types, averaging over city, using post-hoc comparisons based on the estimated marginal means. Values are estimated odds ratios with 90% credible intervals (CI; 5–95%). MPE and significance are defined as in Table S2.

| A)                          |             |                    |              |                     |
|-----------------------------|-------------|--------------------|--------------|---------------------|
| <i>City comparisons</i>     | <i>OR</i>   | <i>CI</i>          | <i>MPE</i>   | <i>Significance</i> |
| <b>Dunedin – Hamilton</b>   | <b>6.55</b> | <b>2.58 – 16.6</b> | <b>0.999</b> | <b>**</b>           |
| <b>Dunedin – Wellington</b> | <b>8.13</b> | <b>3.73 – 19.7</b> | <b>1</b>     | <b>**</b>           |
| Hamilton - Wellington       | 1.25        | 0.56 - 2.85        | 0.675        |                     |
| b)                          |             |                    |              |                     |
| <i>Habitat comparisons</i>  | <i>OR</i>   | <i>CI</i>          | <i>MPE</i>   | <i>Significance</i> |
| <b>Forest - Amenity</b>     | <b>0.35</b> | <b>0.14 - 0.88</b> | <b>0.969</b> | <b>+</b>            |
| Forest - Residential        | <b>0.54</b> | <b>0.24 - 1.21</b> | <b>0.902</b> |                     |
| Amenity - Residential       | 1.51        | 0.59 - 3.74        | 0.776        |                     |

Table S7. Summary statistics for coefficients of parameters in the residential mouse model (Table 5 shows only residential-specific variables). OR, CI, MPE and significance are defined as in Table S2. Effects of categorical variables are relative to a reference category, i.e., Season = Autumn, City = Wellington, Method = Camera, level of maintenance = Low, and Compost = No.

| <i>Parameter</i>                 | <i>OR</i>   | <i>CI</i>          | <i>MPE</i>   | <i>Significance</i> |
|----------------------------------|-------------|--------------------|--------------|---------------------|
| Intercept                        | 0.35        | 0.04 - 3.23        | 0.785        |                     |
| <b>Season = Autumn</b>           | <b>4.72</b> | <b>2.57 - 8.75</b> | <b>1</b>     | <b>**</b>           |
| <b>City = Hamilton</b>           | <b>0.08</b> | <b>0.02 - 0.34</b> | <b>0.999</b> | <b>**</b>           |
| <b>City = Dunedin</b>            | <b>0.17</b> | <b>0.04 - 0.59</b> | <b>0.989</b> | <b>*</b>            |
| Method = Cards                   | 1.76        | 0.76 - 4.19        | 0.869        |                     |
| Level of maintenance = Medium    | 0.85        | 0.29 - 2.65        | 0.598        |                     |
| Level of maintenance = High      | 0.45        | 0.12 - 1.60        | 0.844        |                     |
| Compost = Yes                    | 0.98        | 0.46 - 2.26        | 0.519        |                     |
| Proportion of native vegetation  | 1.40        | 0.26 - 7.24        | 0.634        |                     |
| Garden bed cover                 | 2.54        | 0.11 - 54.1        | 0.695        |                     |
| Mown lawn cover                  | 0.61        | 0.1 - 3.27         | 0.685        |                     |
| Artificial characteristics       | 0.34        | 0.05 - 3.13        | 0.804        |                     |
| <b>Distance to nearest field</b> | <b>0.17</b> | <b>0.04 - 0.65</b> | <b>0.989</b> | <b>*</b>            |
| Leaf litter                      | 0.8         | 0.09 - 6.58        | 0.572        |                     |
| Herb layer cover                 | 3.48        | 0.67 - 21.0        | 0.893        |                     |
| Lower canopy cover               | 0.27        | 0.01 - 4.53        | 0.774        |                     |

Table S8. Mouse detection odds compared *a)* between cities, averaging over habitat types, and *b)* between cities within each habitat type, using post-hoc comparisons based on the estimated marginal means. Values are estimated odds ratios with 90% credible intervals (CI; 5–95%). MPE and significance are defined as in Table S2.

a)

| <i>City comparisons</i>      | <i>OR</i>   | <i>CI</i>          | <i>MPE</i>   | <i>Significance</i> |
|------------------------------|-------------|--------------------|--------------|---------------------|
| <b>Wellington - Hamilton</b> | <b>3.62</b> | <b>1.77 - 7.53</b> | <b>0.999</b> | <b>**</b>           |
| <b>Wellington - Dunedin</b>  | <b>2.36</b> | <b>1.16 - 4.70</b> | <b>0.98</b>  | <b>*</b>            |
| Hamilton - Dunedin           | 0.65        | 0.30 - 1.41        | 0.823        |                     |

b)

| <i>City comparisons</i>      | <i>Habitat type</i> | <i>OR</i>   | <i>CI</i>          | <i>MPE</i>   | <i>Significance</i> |
|------------------------------|---------------------|-------------|--------------------|--------------|---------------------|
| Wellington - Hamilton        | Forest              | 1.43        | 0.47 - 4.29        | 0.708        |                     |
| Wellington - Dunedin         | Forest              | 1.92        | 0.63 - 5.72        | 0.835        |                     |
| Hamilton - Dunedin           | Forest              | 1.33        | 0.36 - 4.85        | 0.64         |                     |
| <b>Wellington - Hamilton</b> | <b>Amenity</b>      | <b>3.21</b> | <b>1.08 - 10.2</b> | <b>0.959</b> | <b>+</b>            |
| Wellington - Dunedin         | Amenity             | 1.56        | 0.54 - 4.74        | 0.755        |                     |
| Hamilton - Dunedin           | Amenity             | 0.49        | 0.14 - 1.81        | 0.831        |                     |
| <b>Wellington - Hamilton</b> | <b>Residential</b>  | <b>10.2</b> | <b>2.95 - 38.3</b> | <b>0.999</b> | <b>**</b>           |
| <b>Wellington - Dunedin</b>  | <b>Residential</b>  | <b>4.34</b> | <b>1.31 - 14.5</b> | <b>0.977</b> | <b>*</b>            |
| Hamilton - Dunedin           | Residential         | 0.43        | 0.10 - 1.73        | 0.841        |                     |



Table S9. Mouse detection compared *a)* between habitat types, averaging over cities, and *b)* between habitat types within each city, using post-hoc comparisons based on the estimated marginal means. Values are estimated odds ratios with 90% credible intervals (CI; 5–95%). MPE and significance are defined as in Table S2.

| <i>a)</i>                    |                 |             |                    |              |                     |
|------------------------------|-----------------|-------------|--------------------|--------------|---------------------|
| <i>Habitat comparisons</i>   |                 | <i>OR</i>   | <i>CI</i>          | <i>MPE</i>   | <i>Significance</i> |
| Forest - Amenity             |                 | 0.91        | 0.45 - 1.91        | 0.58         |                     |
| <b>Forest - Residential</b>  |                 | <b>4.24</b> | <b>1.92 - 9.3</b>  | <b>0.999</b> | <b>**</b>           |
| <b>Amenity - Residential</b> |                 | <b>4.69</b> | <b>2.18 - 10.3</b> | <b>0.999</b> | <b>**</b>           |
| <i>b)</i>                    |                 |             |                    |              |                     |
| <i>Habitat comparisons</i>   | <i>City</i>     | <i>OR</i>   | <i>CI</i>          | <i>MPE</i>   | <i>Significance</i> |
| Forest - Amenity             | Wellington      | 0.74        | 0.29 - 1.93        | 0.697        |                     |
| Forest - Residential         | Wellington      | 1.69        | 0.66 - 4.36        | 0.819        |                     |
| Amenity - Residential        | Wellington      | 2.28        | 0.86 - 6.09        | 0.914        |                     |
| Forest - Amenity             | Hamilton        | 1.66        | 0.47 - 5.92        | 0.742        |                     |
| <b>Forest - Residential</b>  | <b>Hamilton</b> | <b>11.9</b> | <b>2.91 - 50.7</b> | <b>0.998</b> | <b>**</b>           |
| <b>Amenity - Residential</b> | <b>Hamilton</b> | <b>7.09</b> | <b>1.74 - 30.6</b> | <b>0.989</b> | <b>*</b>            |
| Forest - Amenity             | Dunedin         | 0.61        | 0.16 - 2.05        | 0.743        |                     |
| Forest - Residential         | Dunedin         | 3.82        | 0.98 - 14.8        | 0.946        |                     |
| <b>Amenity - Residential</b> | <b>Dunedin</b>  | <b>6.30</b> | <b>1.64 - 24.1</b> | <b>0.988</b> | <b>*</b>            |

Table S10. Possum detection odds compared *a)* between cities, averaging over habitat types, and *b)* between cities within each habitat type, using post-hoc comparisons based on the estimated marginal means. Values are estimated odds ratios with 90% credible intervals (CI; 5–95%). MPE and significance are defined as in Table S2.

a)

| <i>City comparisons</i> | <i>OR</i> | <i>CI</i>  | <i>MPE</i> | <i>Significance</i> |
|-------------------------|-----------|------------|------------|---------------------|
| Dunedin - Hamilton      | 71.52     | 21.2 - 275 | 1          | **                  |

b)

| <i>City comparisons</i> | <i>Habitat type</i> | <i>OR</i> | <i>CI</i>   | <i>MPE</i> | <i>Significance</i> |
|-------------------------|---------------------|-----------|-------------|------------|---------------------|
| Dunedin - Hamilton      | Forest              | 751       | 99.2 - 6527 | 1          | **                  |
| Dunedin - Hamilton      | Amenity             | 8.02      | 2.22 - 37.9 | 0.994      | *                   |
| Dunedin - Hamilton      | Residential         | 54        | 5.06 - 668  | 0.999      | **                  |

Table S11. Possum detection compared *a)* between habitat types, averaging over cities, and *b)* between habitat types within each city, using post-hoc comparisons based on the estimated marginal means. Values are estimated odds ratios with 90% credible intervals (CI; 5–95%). MPE and significance are defined as in Table S2.

a)

| <i>Habitat comparisons</i> | <i>OR</i> | <i>CI</i>   | <i>MPE</i> | <i>Significance</i> |
|----------------------------|-----------|-------------|------------|---------------------|
| Forest - Amenity           | 42.9      | 9.7 - 186   | 1          | **                  |
| Forest - Residential       | 3157      | 206 - 45039 | 1          | **                  |
| Amenity - Residential      | 70.74     | 5.17 - 966  | 0.997      | **                  |

b)

| <i>Habitat comparisons</i> | <i>City</i> | <i>OR</i> | <i>CI</i>    | <i>MPE</i> | <i>Significance</i> |
|----------------------------|-------------|-----------|--------------|------------|---------------------|
| Forest - Amenity           | Dunedin     | 412       | 45.7 - 3753  | 1          | **                  |
| Forest - Residential       | Dunedin     | 11494     | 752 - 201681 | 1          | **                  |
| Amenity - Residential      | Dunedin     | 27        | 2.78 - 285   | 0.99       | *                   |
| Forest - Amenity           | Hamilton    | 4.35      | 1.06 – 20.6  | 0.962      | +                   |
| Forest - Residential       | Hamilton    | 824       | 31.5 - 27184 | 1          | **                  |
| Amenity - Residential      | Hamilton    | 181       | 6.75 - 6962  | 0.995      | **                  |

Table S12. Two city model: Rat detection compared *a)* between habitat types, averaging over cities, and *b)* between habitat types within each city, using post-hoc comparisons based on the estimated marginal means. Values are estimated odds ratios with 90% credible intervals (CI; 5–95%). MPE and significance are defined as in Table S2.

a)

| <i>Habitat comparisons</i> | <i>OR</i> | <i>CI</i>           | <i>MPE</i> | <i>Significance</i> |
|----------------------------|-----------|---------------------|------------|---------------------|
| Forest - Amenity           | 0.04      | 0 - 5.11            | 0.871      |                     |
| Forest - Residential       | 2472      | 13.08 - 537992.61   | 0.994      | *                   |
| Amenity - Residential      | 56957     | 83.59 - 58355527.63 | 0.998      | **                  |

b)

| <i>Habitat comparisons</i> | <i>City</i>  | <i>OR</i> | <i>CI</i>         | <i>MPE</i> | <i>Significance</i> |
|----------------------------|--------------|-----------|-------------------|------------|---------------------|
| Forest - Amenity           | New Plymouth | 0.05      | 0 - 6.68          | 0.855      |                     |
| Forest - Residential       | New Plymouth | 2250      | 7.66 - 455126     | 0.99       | *                   |
| Amenity - Residential      | New Plymouth | 42484     | 45.6 - 36753593   | 0.996      | **                  |
| Forest - Amenity           | Tauranga     | 0.03      | 0 - 16.49         | 0.821      |                     |
| Forest - Residential       | Tauranga     | 2654      | 3.63 - 2337127    | 0.98       | *                   |
| Amenity - Residential      | Tauranga     | 76985     | 19.19 - 543761968 | 0.991      | *                   |

Table S13: Two city model: Hedgehog detection compared between habitat types using post-hoc comparisons based on the estimated marginal means. Values are estimated odds ratios with 90% credible intervals (CI; 5–95%). MPE and significance are defined as in Table S2.

| <i>Habitat comparisons</i> | <i>OR</i> | <i>CI</i> | <i>MPE</i> | <i>Significance</i> |
|----------------------------|-----------|-----------|------------|---------------------|
| Forest - Amenity           | 0.13      | 0 - 28.1  | 0.738      |                     |
| Forest - Residential       | 0.01      | 0 - 1.06  | 0.949      |                     |
| Amenity - Residential      | 0.09      | 0 - 20.4  | 0.779      |                     |

Table S14. Two city model: Mouse detection compared *a)* between habitat types, averaging over cities, and *b)* between habitat types within each city, using post-hoc comparisons based on the estimated marginal means. Values are estimated odds ratios with 90% credible intervals (CI; 5–95%). MPE and significance are defined as in Table S2.

| <i>a)</i>                    |                     |             |                         |              |                     |
|------------------------------|---------------------|-------------|-------------------------|--------------|---------------------|
| <i>Habitat comparisons</i>   |                     | <i>OR</i>   | <i>CI</i>               | <i>MPE</i>   | <i>Significance</i> |
| Forest - Amenity             |                     | 0.04        | 0 - 1.87                | 0.939        |                     |
| <b>Forest - Residential</b>  |                     | 246.21      | 4.09 - 29764            | 0.991        | *                   |
| <b>Amenity - Residential</b> |                     | 7331.42     | 54.92 - 2500470         | 0.999        | **                  |
| <i>b)</i>                    |                     |             |                         |              |                     |
| <i>Habitat comparisons</i>   | <i>City</i>         | <i>OR</i>   | <i>CI</i>               | <i>MPE</i>   | <i>Significance</i> |
| <b>Forest - Amenity</b>      | <b>New Plymouth</b> | <b>0.01</b> | <b>0 - 0.69</b>         | <b>0.962</b> | <b>+</b>            |
| Forest - Residential         | New Plymouth        | 18.57       | 0.23 - 2548             | 0.876        |                     |
| <b>Amenity - Residential</b> | <b>New Plymouth</b> | <b>1805</b> | <b>8.2 - 625848</b>     | <b>0.994</b> | <b>*</b>            |
| Forest - Amenity             | Tauranga            | 0.13        | 0 - 17.3                | 0.771        |                     |
| <b>Forest - Residential</b>  | <b>Tauranga</b>     | <b>3482</b> | <b>11.8 - 1101999</b>   | <b>0.994</b> | <b>*</b>            |
| <b>Amenity - Residential</b> | <b>Tauranga</b>     | <b>2953</b> | <b>40.4 - 419899613</b> | <b>0.997</b> | <b>**</b>           |

Table S15. Two city model: Possum detection compared *a)* between habitat types, averaging over cities, and *b)* between habitat types within each city, using post-hoc comparisons based on the estimated marginal means. Values are estimated odds ratios with 90% credible intervals (CI; 5–95%). MPE and significance are defined as in Table S2.

| <i>a)</i>                    |              |           |                |            |                     |
|------------------------------|--------------|-----------|----------------|------------|---------------------|
| <i>Habitat comparisons</i>   |              | <i>OR</i> | <i>CI</i>      | <i>MPE</i> | <i>Significance</i> |
| <b>Forest - Amenity</b>      |              | 0.43      | 0 - 38.5       | 0.633      |                     |
| <b>Forest - Residential</b>  |              | 303       | 0.72 - 176334  | 0.947      |                     |
| <b>Amenity - Residential</b> |              | 740       | 0.45 - 959342  | 0.941      |                     |
| <i>b)</i>                    |              |           |                |            |                     |
| <i>Habitat comparisons</i>   | <i>City</i>  | <i>OR</i> | <i>CI</i>      | <i>MPE</i> | <i>Significance</i> |
| Forest - Amenity             | New Plymouth | 0.12      | 0 - 11.8       | 0.781      |                     |
| <b>Forest - Residential</b>  | New Plymouth | 115.09    | 0.29 - 50606   | 0.911      |                     |
| <b>Amenity - Residential</b> | New Plymouth | 939       | 0.97 - 1647935 | 0.946      |                     |
| Forest - Amenity             | Tauranga     | 1.49      | 0 - 572        | 0.547      |                     |
| <b>Forest - Residential</b>  | Tauranga     | 801       | 0.28 - 2506084 | 0.93       |                     |
| <b>Amenity - Residential</b> | Tauranga     | 558.31    | 0.04 - 7529472 | 0.874      |                     |
